# Supplementary material for: Obesity paradox in stroke – Myth or reality? A systematic review
Source: PubMed Central journal article supplement (PMC5349441; doi:10.1371/journal.pone.0171334), 2017-03-14

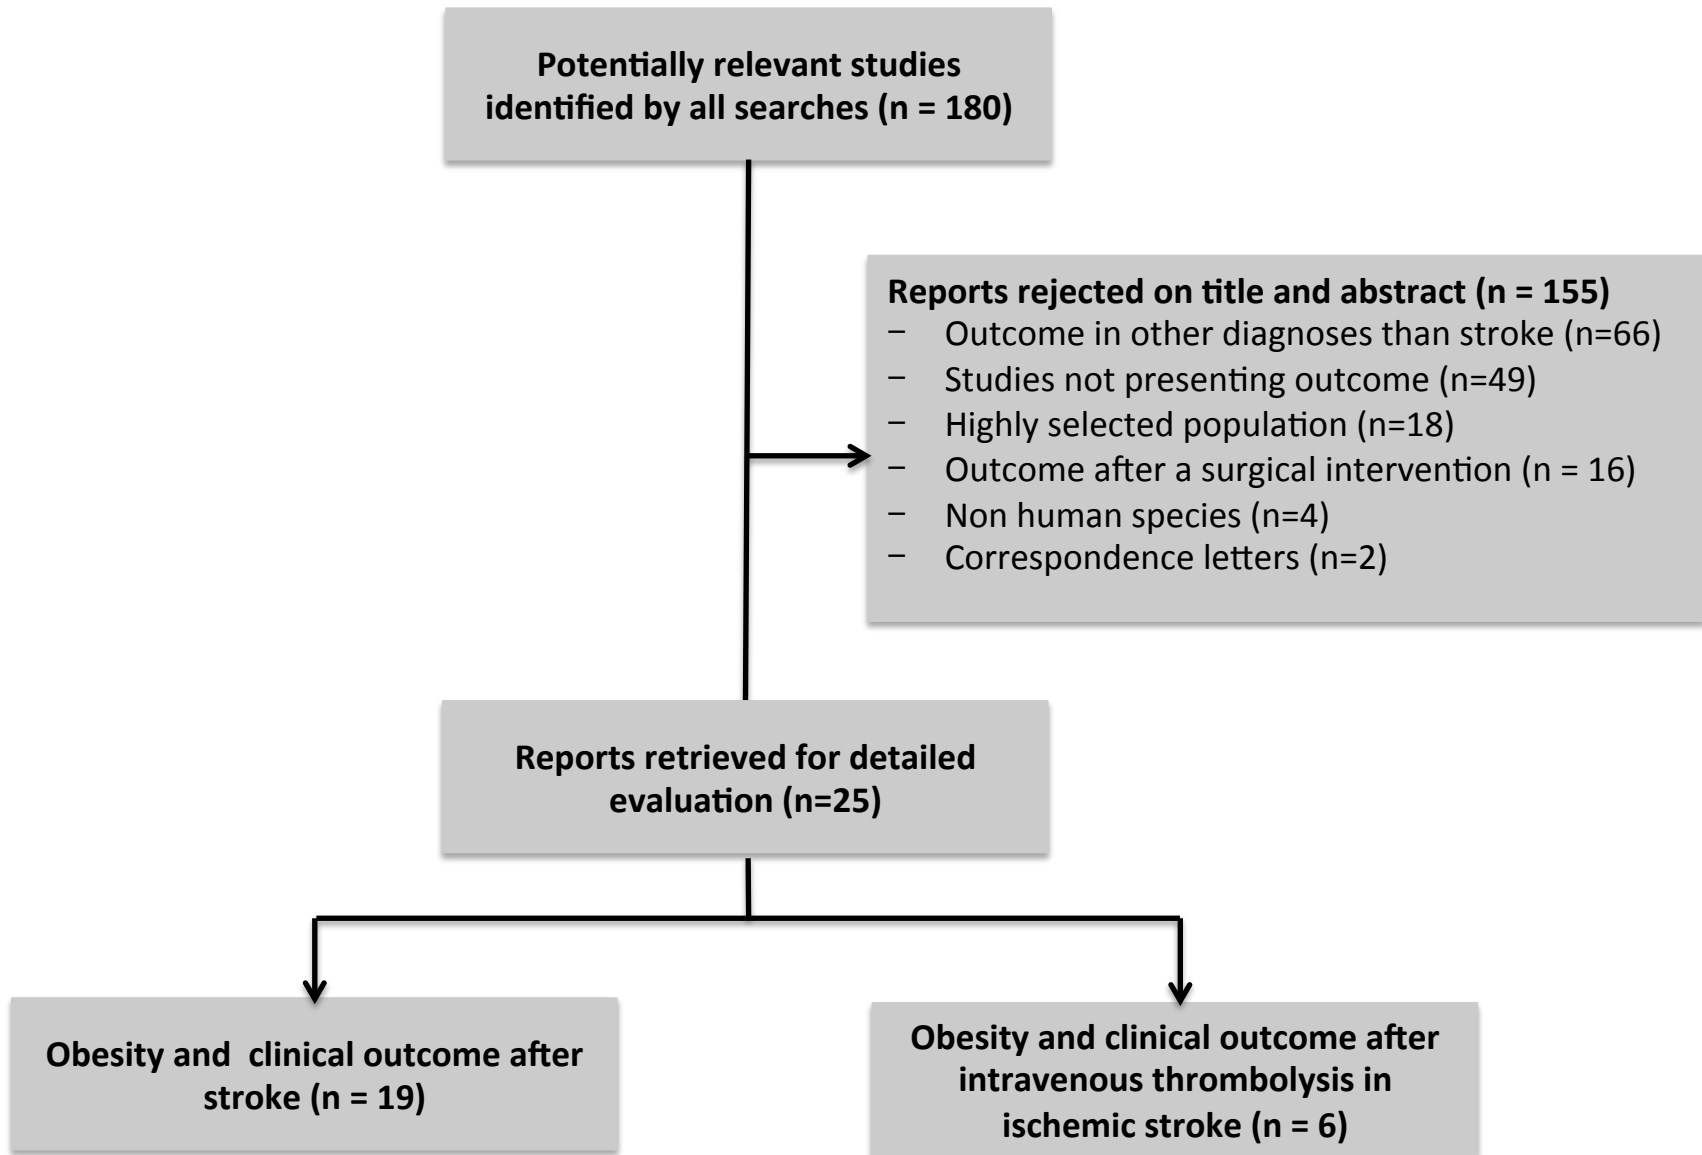

Supplement: pone.0171334.s001.pdf [file pone.0171334.s001.pdf]
