# Supplementary material for: Obesity paradox in stroke – Myth or reality? A systematic review
Source: PubMed Central journal article supplement (PMC5349441; doi:10.1371/journal.pone.0171334), 2017-03-14
Supplement: pone.0171334.s003.pdf [file pone.0171334.s003.pdf]

**S1 Table. Studies addressing Body Mass Index and mortality after stroke**

| Study                    | Patients with information on Body Mass Index (n) | Follow-Up                                                                              | Risk of Mortality                             |                                          | Factors adjusted for in multivariate analysis                                                          |
|--------------------------|--------------------------------------------------|----------------------------------------------------------------------------------------|-----------------------------------------------|------------------------------------------|--------------------------------------------------------------------------------------------------------|
| Olsen, 2008[1] (Denmark) | 21 784 patients with acute stroke                | 5 year mortality (Median Follow-up 1.5 years)                                          | Underweight: HR: 1.63 (95% CI 1.41 – 1.90)    |                                          | Age, Sex, Civil Status, stroke severity (Scandinavian Stroke Scale score), cardiovascular risk factors |
|                          |                                                  |                                                                                        | Normal-weight: HR: 1 (reference)              |                                          |                                                                                                        |
|                          |                                                  |                                                                                        | Overweight: HR: 0.73 (95% CI 0.66-0.81)       |                                          |                                                                                                        |
|                          |                                                  |                                                                                        | Obese: HR: 0.84 (95% CI 0.74 – 0.96)          |                                          |                                                                                                        |
|                          |                                                  |                                                                                        | Severely Obese: HR: 0.84 (95% CI 0.64 – 1.10) |                                          |                                                                                                        |
| Towfighi, 2009[2] (USA)  | 644 patients with baseline history of stroke     | All - cause mortality rate ratios per kg/m <sup>2</sup> relative to person of same age | Age 40: HR: 1.05 (95% CI 0.99 – 1.11)         |                                          | Age, Hypertension, Diabetes, Hypercholesterolemia, Smoking, History of myocardial infarction           |
|                          |                                                  | (Median Follow up 11.5 years)                                                          | Age 80: HR: 0.95 (95% CI 0.95 – 0.98)         |                                          |                                                                                                        |
| Vemmos, 2011[3] (Greece) | 2785 patients with first-ever acute stroke       | Cumulative probability of Survival (%) (Median Follow-Up 47 months)                    | 1 wk                                          | Normal-weight: 90.2 (95% CI 88.4 – 92.0) | -                                                                                                      |
|                          |                                                  |                                                                                        |                                               | Overweight: 92.8 (95% CI 91.2 – 94.4)    |                                                                                                        |
|                          |                                                  |                                                                                        |                                               | Obese: 96.4 (95% CI 94.8 – 97.9)         |                                                                                                        |
|                          |                                                  |                                                                                        | 10 yr                                         | Normal-weight: 41.5 (95% CI 39.7 – 45.0) |                                                                                                        |
|                          |                                                  |                                                                                        |                                               | Overweight: 47.4 (95% CI 43.5 – 51.3)    |                                                                                                        |
|                          |                                                  |                                                                                        |                                               | Obese: 10 yr: 52.5 (95% CI 46.4 – 58.6)  |                                                                                                        |
| 10 yr mortality          | Normal-weight: HR: 1 (reference)                 |                                                                                        | Age, Discharge Treatment                      |                                          |                                                                                                        |

|                               |                                           |                                                                                        |                                            |                                                                                                                                                                            |
|-------------------------------|-------------------------------------------|----------------------------------------------------------------------------------------|--------------------------------------------|----------------------------------------------------------------------------------------------------------------------------------------------------------------------------|
|                               |                                           |                                                                                        | Overweight: HR: 0.84 (95% CI 0.73 - 0.97)  |                                                                                                                                                                            |
|                               |                                           |                                                                                        | Obese: HR: 0.74 (95% CI 0.61 – 0.90)       |                                                                                                                                                                            |
| Kim, 2011[4]<br>(South Korea) | 1356 patients with hemorrhagic stroke     | 30 – day mortality                                                                     | Underweight: HR: 0.75 (95% CI 0.26 – 2.11) | Age at study entry, diabetes, Glasgow Coma Scale Score, surgical management, systolic blood pressure, glucose, volume of hematoma, extension of hemorrhage into ventricles |
|                               |                                           |                                                                                        | Normal-weight: HR: 1 (reference)           |                                                                                                                                                                            |
|                               |                                           |                                                                                        | Overweight: HR: 0.86 (95% CI 0.47 – 1.56)  |                                                                                                                                                                            |
|                               |                                           |                                                                                        | Obese: HR: 0.89 (95% CI 0.47 – 1.68)       |                                                                                                                                                                            |
|                               |                                           | Long - term mortality<br>(Mean Follow-Up 33.6 months)                                  | Underweight: HR: 1.64 (95% CI 1.11 – 2.40) |                                                                                                                                                                            |
|                               |                                           |                                                                                        | Normal-weight: HR: 1 (reference)           |                                                                                                                                                                            |
|                               |                                           |                                                                                        | Overweight: HR: 0.69 (95% CI 0.49 – 0.96)  |                                                                                                                                                                            |
|                               |                                           |                                                                                        | Obese: HR: 0.61 (95% CI 0.43 – 0.88)       |                                                                                                                                                                            |
| Ryu, 2011[5]<br>(South Korea) | 1592 patients with ischemic stroke        | Long - term all-cause mortality (Median Follow-Up 4 years)                             | Underweight: HR: 2.79 (95% CI 1.92 – 4.05) | Age, sex, previous stroke, hypertension, diabetes, current smoking, heart disease, NIHSS score categorized into 0-1, 2-3, 4-6, and $\geq 7$                                |
|                               |                                           |                                                                                        | Normal-weight: HR: 1 (reference)           |                                                                                                                                                                            |
|                               |                                           |                                                                                        | Overweight: HR: 0.95 (95% CI 0.73 – 1.25)  |                                                                                                                                                                            |
|                               |                                           |                                                                                        | Obese: HR: 0.76 (95% CI 0.57 – 1.01)       |                                                                                                                                                                            |
| Kim, 2012[6]<br>(South Korea) | 34132 patients with acute ischemic stroke | Mortality rate ratios per $\text{kg/m}^2$ increase of BMI (Mean Follow-Up 32.6 months) | HR: 0.96 (95% CI 0.95 – 0.97)              | -                                                                                                                                                                          |

|                               |                                  |                                                                 |                                            |                                                                                                                                                                                                                                                                                |   |
|-------------------------------|----------------------------------|-----------------------------------------------------------------|--------------------------------------------|--------------------------------------------------------------------------------------------------------------------------------------------------------------------------------------------------------------------------------------------------------------------------------|---|
|                               |                                  | Mortality at various time points after onset of ischemic stroke | 30 d                                       | BMI < 18.5: HR: 1.04 (95% CI 0.85 – 1.27)                                                                                                                                                                                                                                      | - |
|                               |                                  |                                                                 |                                            | BMI 20 – 23: HR: 1 (reference)                                                                                                                                                                                                                                                 |   |
|                               |                                  |                                                                 |                                            | BMI 23 – 25: HR: 1.05 (95% CI 0.90 – 1.22)                                                                                                                                                                                                                                     |   |
|                               |                                  |                                                                 |                                            | BMI 27.5 – 30: HR: 1.23 (95% CI 0.95 – 1.59)                                                                                                                                                                                                                                   |   |
|                               |                                  |                                                                 | 90 d                                       | BMI < 18.5: HR: 1.21 (95% CI 1.06 – 1.39)                                                                                                                                                                                                                                      |   |
|                               |                                  |                                                                 |                                            | BMI 20 – 23: HR: 1 (reference)                                                                                                                                                                                                                                                 |   |
|                               |                                  |                                                                 |                                            | BMI 23 – 25: HR: 0.98 (95% CI 0.87 – 1.11)                                                                                                                                                                                                                                     |   |
|                               |                                  |                                                                 |                                            | BMI 27.5 – 30: HR: 1.06 (0.86 – 1.30)                                                                                                                                                                                                                                          |   |
|                               |                                  |                                                                 | 1 yr                                       | BMI < 18.5: HR: 1.30 (95% CI 1.17 – 1.44)                                                                                                                                                                                                                                      |   |
|                               |                                  |                                                                 |                                            | BMI 20 – 23: HR: 1 (reference)                                                                                                                                                                                                                                                 |   |
|                               |                                  |                                                                 |                                            | BMI 23 – 25: HR: 0.90 (95% CI 0.83 – 0.99)                                                                                                                                                                                                                                     |   |
|                               |                                  |                                                                 |                                            | BMI 27.5 – 30: HR 0.92 (0.79 – 1.07)                                                                                                                                                                                                                                           |   |
| Doehner, 2013[7]<br>(Germany) | 1521 patients with TIA or stroke | Death at 30 months Follow-Up                                    | Underweight: HR: 2.76 (95% CI 1.75 – 4.36) | Age, sex, living in partnership prior to the event, co-morbidities, stroke severity, classification of the cerebral event (TIA vs. ischemic stroke vs. intracerebral hemorrhage), assignment to the Telestroke Unit or conventional treatment arm of the TEMPiS study protocol |   |
|                               |                                  |                                                                 | Normal weight: HR: 1.0 (reference)         |                                                                                                                                                                                                                                                                                |   |
|                               |                                  |                                                                 | Overweight: HR: 0.86 (95% CI 0.69 – 1.08)  |                                                                                                                                                                                                                                                                                |   |
|                               |                                  |                                                                 | Obese: HR: 0.76 (95% CI 0.53 – 1.10)       |                                                                                                                                                                                                                                                                                |   |
|                               |                                  |                                                                 | Very obese: HR: 0.55 (95% CI 0.29 – 1.02)  |                                                                                                                                                                                                                                                                                |   |
| Bell, 2013[8]                 | 3173                             | Mortality (Follow-Up time)                                      | Underweight: HR: 2.02 (95% CI 0.98 – 4.16) | Age, marriage, social support                                                                                                                                                                                                                                                  |   |

|                            |                                                     |                                                                          |                                              |                                                                                                                                                                                                                                                                                                                             |
|----------------------------|-----------------------------------------------------|--------------------------------------------------------------------------|----------------------------------------------|-----------------------------------------------------------------------------------------------------------------------------------------------------------------------------------------------------------------------------------------------------------------------------------------------------------------------------|
| (USA)                      | postmenopausal women aged 50 – 79 with stroke       | unknown)                                                                 | Normal weight: HR: 1.0 (reference)           | score, income, diabetes, hypertension, smoking status, pre-stroke physical activity, pre-stroke functional ability, incident stroke type, prevalent conditions pre-stroke, post-stroke Glasgow outcome scale                                                                                                                |
|                            |                                                     |                                                                          | Overweight: HR: 0.72 (95% CI 0.58 – 0.90)    |                                                                                                                                                                                                                                                                                                                             |
|                            |                                                     |                                                                          | Obese: HR: 0.69 (95% CI 0.53 – 0.88)         |                                                                                                                                                                                                                                                                                                                             |
| Skolarus, 2014[9]<br>(USA) | 1791 Patients with acute ischemic stroke ≥ 45 years | All-cause mortality in acute ischemic stroke (Median Follow-Up 660 days) | -                                            | Age, race/ ethnicity, sex, stroke severity, hypertension, atrial fibrillation, coronary artery disease, diabetes mellitus, heart failure, high cholesterol chronic obstructive pulmonary disease, dementia, end-stage renal disease, cancer, history of stroke or transient ischemic attack, excessive alcohol use, smoking |
|                            |                                                     |                                                                          | -                                            |                                                                                                                                                                                                                                                                                                                             |
| Zhao, 2014[10]<br>(China)  | 10905 patients with t acute ischemic stroke         | All-cause mortality at 3-month Follow-Up                                 | Underweight: OR: 1.30 (95% CI 0.93 – 1.82)   | Age, gender, stroke severity (NIHSS), prestroke mRS, AIS Trial of ORG 10172 in Acute Stroke Treatment subtype, and risk factors or comorbidities (including hypertension, diabetes,                                                                                                                                         |
|                            |                                                     |                                                                          | Normal-weight: OR: 1 (reference)             |                                                                                                                                                                                                                                                                                                                             |
|                            |                                                     |                                                                          | Overweight: OR: 1.06 (95% CI 0.89 – 1.28)    |                                                                                                                                                                                                                                                                                                                             |
|                            |                                                     |                                                                          | Obese: OR: 1.06 (95% CI 0.81 – 1.38)         |                                                                                                                                                                                                                                                                                                                             |
|                            |                                                     |                                                                          | Severely obese: OR 2.01 (95% CI 1.10 – 3.69) |                                                                                                                                                                                                                                                                                                                             |

|                                 |                                              |                                           |                                            |                                                                                                                                          |                                                                                                                                           |
|---------------------------------|----------------------------------------------|-------------------------------------------|--------------------------------------------|------------------------------------------------------------------------------------------------------------------------------------------|-------------------------------------------------------------------------------------------------------------------------------------------|
|                                 |                                              |                                           |                                            | dyslipidemia, coronary heart disease, atrial fibrillation or flutter, heart failure, current or previous smoking, and history of stroke) |                                                                                                                                           |
| Dehlendorff, 2014[11] (Denmark) | 53'812 patients with acute stroke            | Mortality at 1 week and 1 month Follow-Up | 1 wk                                       | Underweight: HR: 1.41 (95% CI 1.13 – 1.76)                                                                                               | Age, sex, stroke type, stroke severity (Scandinavian Stroke Scale score), cardiovascular risk factors, civil status, socioeconomic status |
|                                 |                                              |                                           |                                            | Normal weight: HR: 1.0 (reference)                                                                                                       |                                                                                                                                           |
|                                 |                                              |                                           |                                            | Overweight: HR: 0.85 (95% CI 0.69 – 1.04)                                                                                                |                                                                                                                                           |
|                                 |                                              |                                           |                                            | Obese: HR: 1.19 (95% CI 0.92 – 1.52)                                                                                                     |                                                                                                                                           |
|                                 |                                              |                                           | 1 m                                        | Underweight: HR: 1.55 (95% CI 1.37 – 1.76)                                                                                               |                                                                                                                                           |
|                                 |                                              |                                           |                                            | Normal weight: HR: 1.0 (reference)                                                                                                       |                                                                                                                                           |
|                                 |                                              |                                           |                                            | Overweight: HR: 0.88 (95% CI 0.78 – 0.98)                                                                                                |                                                                                                                                           |
|                                 |                                              |                                           |                                            | Obese: HR: 0.98 (95% CI 0.84 – 1.15)                                                                                                     |                                                                                                                                           |
| Andersen, 2015[12] (Denmark)    | 29'326 patients with acute first-ever stroke | Mortality (Median Follow-Up 2.6 years)    | Underweight: HR: 1.66 (95% CI 1.49 – 1.84) |                                                                                                                                          | Cardiovascular risk factors, age, gender, civil status, stroke severity (Scandinavian Stroke Scale score),                                |
|                                 |                                              |                                           | Normal weight: HR: 1.0 (reference)         |                                                                                                                                          |                                                                                                                                           |
|                                 |                                              |                                           | Overweight: HR: 0.72 (95% CI 0.68 – 0.78)  |                                                                                                                                          |                                                                                                                                           |
|                                 |                                              |                                           | Obese: HR: 0.80 (95% CI 0.73 – 0.88)       |                                                                                                                                          |                                                                                                                                           |

HR: Hazard Ratio, OR: Odds Ratio, RR: Relative Risk, CI: Confidence Interval, - : no data available in study, wk: week, m: month, yr: year

1. Olsen TS, Dehlendorff C, Petersen HG, Andersen KK (2008) Body mass index and poststroke mortality. *Neuroepidemiology* 30: 93-100.
2. Towfighi A, Ovbiagele B (2009) The impact of body mass index on mortality after stroke. *Stroke* 40: 2704-2708.
3. Vemmos K, Ntaios G, Spengos K, Savvari P, Vemmu A, et al. (2011) Association between obesity and mortality after acute first-ever stroke: the obesity-stroke paradox. *Stroke* 42: 30-36.

4. Kim BJ, Lee SH, Ryu WS, Kim CK, Lee J, et al. (2011) Paradoxical longevity in obese patients with intracerebral hemorrhage. *Neurology* 76: 567-573.
5. Ryu WS, Lee SH, Kim CK, Kim BJ, Yoon BW (2011) Body mass index, initial neurological severity and long-term mortality in ischemic stroke. *Cerebrovasc Dis* 32: 170-176.
6. Kim BJ, Lee SH, Jung KH, Yu KH, Lee BC, et al. (2012) Dynamics of obesity paradox after stroke, related to time from onset, age, and causes of death. *Neurology* 79: 856-863.
7. Doehner W, Schenkel J, Anker SD, Springer J, Audebert HJ (2013) Overweight and obesity are associated with improved survival, functional outcome, and stroke recurrence after acute stroke or transient ischaemic attack: observations from the TEMPiS trial. *Eur Heart J* 34: 268-277.
8. Bell CL, LaCroix A, Masaki K, Hade EM, Manini T, et al. (2013) Prestroke factors associated with poststroke mortality and recovery in older women in the Women's Health Initiative. *J Am Geriatr Soc* 61: 1324-1330.
9. Skolarus LE, Sanchez BN, Levine DA, Baek J, Kerber KA, et al. (2014) Association of body mass index and mortality after acute ischemic stroke. *Circ Cardiovasc Qual Outcomes* 7: 64-69.
10. Zhao L, Du W, Zhao X, Liu L, Wang C, et al. (2014) Favorable functional recovery in overweight ischemic stroke survivors: findings from the China National Stroke Registry. *J Stroke Cerebrovasc Dis* 23: e201-206.
11. Dehlendorff C, Andersen KK, Olsen TS (2014) Body mass index and death by stroke: no obesity paradox. *JAMA Neurol* 71: 978-984.
12. Andersen KK, Olsen TS (2015) The obesity paradox in stroke: lower mortality and lower risk of readmission for recurrent stroke in obese stroke patients. *Int J Stroke* 10: 99-104.
