# Supplementary material for: Obesity paradox in stroke – Myth or reality? A systematic review
Source: PubMed Central journal article supplement (PMC5349441; doi:10.1371/journal.pone.0171334), 2017-03-14
Supplement: pone.0171334.s005.pdf [file pone.0171334.s005.pdf]

S3 Table. Studies addressing Obesity and outcome after thrombolysis in ischemic stroke

| Study                                                                                                                                      | Patients (n)                                                                                                                                                | Outcome                                           | Results                       |                               | Factors adjusted for in multivariate analysis                                                                                                                                                                                                        |
|--------------------------------------------------------------------------------------------------------------------------------------------|-------------------------------------------------------------------------------------------------------------------------------------------------------------|---------------------------------------------------|-------------------------------|-------------------------------|------------------------------------------------------------------------------------------------------------------------------------------------------------------------------------------------------------------------------------------------------|
|                                                                                                                                            |                                                                                                                                                             |                                                   |                               |                               |                                                                                                                                                                                                                                                      |
| Diedler, 2011[1]<br>(Germany, Sweden, Italy, Slovak Republic)                                                                              | 27'910 patients registered in Safe Implementation of Treatment in Stroke–International Stroke Thrombolysis Register (SITS-ISTR), 1190 (4.3%) weighed >100kg | Major neurological improvement                    | 2h                            | OR: 0.92 (95% CI 0.76 – 1.12) | Age, sex, history of hypertension, diabetes mellitus, hyperlipidemia, smoking, stroke subtypes (lacunar vs other), baseline National Institutes of Health Stroke Scale score (NIHSS), baseline blood glucose, blood pressure, alteplase dose (mg/kg) |
|                                                                                                                                            |                                                                                                                                                             |                                                   | 24h                           | OR: 1.12 (95% CI 0.97 – 1.20) |                                                                                                                                                                                                                                                      |
|                                                                                                                                            |                                                                                                                                                             | Incidence of symptomatic intracerebral hemorrhage | Per SITS MOST                 | OR: 1.60 (95% CI 1.06 – 2.41) |                                                                                                                                                                                                                                                      |
|                                                                                                                                            |                                                                                                                                                             |                                                   | Per ECASS II                  | OR: 1.08 (95% CI 0.81 – 1.43) |                                                                                                                                                                                                                                                      |
|                                                                                                                                            |                                                                                                                                                             | Functional outcome at 3 months                    | mRS 0 - 1                     | OR: 1.01 (95% CI 0.87 – 1.18) |                                                                                                                                                                                                                                                      |
|                                                                                                                                            |                                                                                                                                                             |                                                   | mRS 0 - 2                     | OR: 0.99 (95% CI 0.84 – 1.17) |                                                                                                                                                                                                                                                      |
|                                                                                                                                            |                                                                                                                                                             | Mortality at 3 months                             | OR: 1.32 (95% CI 1.08 – 1.74) |                               |                                                                                                                                                                                                                                                      |
| Sarikaya, 2011[2]<br>(Switzerland)                                                                                                         | 304 patients with acute ischemic stroke who underwent IVT with alteplase but no other or additional                                                         | Death at 3 months                                 | Non-obese: 4.0 %              |                               |                                                                                                                                                                                                                                                      |
|                                                                                                                                            |                                                                                                                                                             |                                                   | Obese: 13.2 %                 |                               |                                                                                                                                                                                                                                                      |
|                                                                                                                                            |                                                                                                                                                             | Favorable outcome at 3 months                     | Non-obese: 68.1 %             |                               |                                                                                                                                                                                                                                                      |
|                                                                                                                                            |                                                                                                                                                             |                                                   | Obese: 50.9 %                 |                               |                                                                                                                                                                                                                                                      |
|                                                                                                                                            |                                                                                                                                                             | Symptomatic intracranial hemorrhage at 3 months   | Non-obese: 1.6 %              |                               |                                                                                                                                                                                                                                                      |
|                                                                                                                                            |                                                                                                                                                             |                                                   | Obese: 1.9 %                  |                               |                                                                                                                                                                                                                                                      |
| Age, gender, hypertension, diabetes mellitus, smoking status, baseline National Institutes of Health Stroke Scale score (NIHSS), time from |                                                                                                                                                             |                                                   |                               |                               |                                                                                                                                                                                                                                                      |

|                                    |                                                             |                                                    |                                  |                                                                                                                                                                           |                                 |
|------------------------------------|-------------------------------------------------------------|----------------------------------------------------|----------------------------------|---------------------------------------------------------------------------------------------------------------------------------------------------------------------------|---------------------------------|
|                                    | thrombolytic treatment                                      |                                                    |                                  | stroke onset to treatment, prestroke treatment with antiplatelet agents                                                                                                   |                                 |
| Sarikaya, 2011[3]<br>(Switzerland) | 1479 patients with acute ischemic stroke who underwent IVT  | Favorable outcome at 3 – months (mRS score 0 or 1) | Weight > 100kg: 45.3%            | Baseline National Institutes of Health Stroke Scale score (NIHSS), age, gender, blood glucose, diastolic blood pressure, antiplatelet medication, systolic blood pressure |                                 |
|                                    |                                                             |                                                    | Weight < 100kg: 47.6%            |                                                                                                                                                                           |                                 |
|                                    |                                                             |                                                    | OR: 0.715 (95% CI 0.422 – 1.213) |                                                                                                                                                                           |                                 |
|                                    |                                                             | Good outcome at 3 – months (mRS score 0 – 2)       | Weight > 100kg: 57.9%            |                                                                                                                                                                           |                                 |
|                                    |                                                             |                                                    | Weight < 100kg: 63.9%            |                                                                                                                                                                           |                                 |
|                                    |                                                             |                                                    | OR: 0.776 (95% CI 0.265 – 0.807) |                                                                                                                                                                           |                                 |
|                                    |                                                             | Mortality rate at 3 months                         | Weight > 100 kg: 16.8%           |                                                                                                                                                                           |                                 |
|                                    |                                                             |                                                    | Weight < 100 kg: 12.3%           |                                                                                                                                                                           |                                 |
|                                    |                                                             |                                                    | OR: 1.445 (95% CI 1.305 – 5.341) |                                                                                                                                                                           |                                 |
|                                    |                                                             | Rate of symptomatic intracranial hemorrhage (SICH) | NINDS definition                 |                                                                                                                                                                           | Weight > 100kg: 1.1%            |
|                                    |                                                             |                                                    |                                  |                                                                                                                                                                           | Weight < 100kg: 5.4%            |
|                                    |                                                             |                                                    |                                  |                                                                                                                                                                           | OR 0.190 (95% CI 0.041 – 2.251) |
| ECAS II Definition                 | Weight > 100kg: 1.1%                                        |                                                    |                                  |                                                                                                                                                                           |                                 |
|                                    | Weight < 100kg: 4.6%                                        |                                                    |                                  |                                                                                                                                                                           |                                 |
|                                    | OR: 0.372 (95% CI 0.049 – 2.790)                            |                                                    |                                  |                                                                                                                                                                           |                                 |
| Hassan, 2013[4]<br>(USA)           | Total of 81579 patients admitted with acute ischemic stroke | No to minimal disability                           | OR: 1.0 (95% CI 0.8 – 1.1)       | Age, sex, diabetes, hypertension renal failure, hospital location/ teaching                                                                                               |                                 |
|                                    |                                                             | Moderate to severe disability                      | OR: 1.2 (95% CI 1.0 – 1.3)       |                                                                                                                                                                           |                                 |
|                                    |                                                             | Mortality                                          | OR: 0.6 (95% CI 0.5 – 0.8)       |                                                                                                                                                                           |                                 |
|                                    |                                                             | ICH secondary to                                   | OR: 0.7 (95% CI 0.5 – 0.9)       |                                                                                                                                                                           |                                 |

|                                   |                                                                                                                                                   |                                      |                                            |                                                                                                                                                                                                                                             |
|-----------------------------------|---------------------------------------------------------------------------------------------------------------------------------------------------|--------------------------------------|--------------------------------------------|---------------------------------------------------------------------------------------------------------------------------------------------------------------------------------------------------------------------------------------------|
|                                   | undergoing thrombolysis, of these 5174 (6.3%) patients categorized as obese                                                                       | thrombolytic treatment               |                                            | status, APR-DRG severity scale                                                                                                                                                                                                              |
| Seo, 2013[5]<br>(South Korea)     | 321 patients treated with thrombolysis therapy, including intravenous recombinant tissue plasminogen activator and/or intra-arterial thrombolysis | Long-term mortality                  | Underweight: HR: 3.49 (95% CI 1.44 – 8.46) | Age, sex, hypertension, atrial fibrillation, baseline National Institutes of Health Stroke Scale score on admission (NIHSS), thrombolysis methods, current smoking status, homocysteine, low-density lipoprotein, apolipoprotein B, free T4 |
|                                   |                                                                                                                                                   |                                      | Normal weight: Reference                   |                                                                                                                                                                                                                                             |
|                                   |                                                                                                                                                   |                                      | Overweight: HR: 0.66 (95% CI 0.33 - 1.34)  |                                                                                                                                                                                                                                             |
|                                   |                                                                                                                                                   |                                      | Obese: HR: 1.35 (95% CI 0.66 – 2.78)       |                                                                                                                                                                                                                                             |
| Seet, 2014[6]<br>(USA, Singapore) | 169 patients with acute ischemic stroke who received intravenous                                                                                  | Symptomatic intracerebral hemorrhage | Normal-weight: OR: 1 (reference)           | Age, stroke severity (Baseline National Institutes of Health Stroke Scale score (NIHSS)), stroke                                                                                                                                            |
|                                   |                                                                                                                                                   |                                      | Overweight: OR: 0.94 (95% CI 0.52 – 5.12)  |                                                                                                                                                                                                                                             |
|                                   |                                                                                                                                                   |                                      | Obese: OR: 0.82 (95% CI 0.63 – 4.94)       |                                                                                                                                                                                                                                             |
|                                   |                                                                                                                                                   | Poor functional recovery             | Normal-weight: OR: 1 (reference)           |                                                                                                                                                                                                                                             |
|                                   |                                                                                                                                                   |                                      | Overweight: OR: 1.12 (95% CI 0.54 – 6.21)  |                                                                                                                                                                                                                                             |

|  |                                                    |  |                                      |         |
|--|----------------------------------------------------|--|--------------------------------------|---------|
|  | thrombolysis<br>within 3 hours of<br>symptom onset |  | Obese: OR: 1.08 (95% CI 0.45 - 4.21) | subtype |
|--|----------------------------------------------------|--|--------------------------------------|---------|

HR: Hazard Ratio, OR: Odds Ratio, RR: Relative Risk, CI: Confidence Interval, - : no data available in study, wk: week, m: month, yr: year

1. Diedler J, Ahmed N, Glahn J, Grond M, Lorenzano S, et al. (2011) Is the maximum dose of 90 mg alteplase sufficient for patients with ischemic stroke weighing >100 kg? *Stroke* 42: 1615-1620.
2. Sarikaya H, Elmas F, Arnold M, Georgiadis D, Baumgartner RW (2011) Impact of obesity on stroke outcome after intravenous thrombolysis. *Stroke* 42: 2330-2332.
3. Sarikaya H, Arnold M, Engelter ST, Lyrer PA, Mattle HP, et al. (2011) Outcome of intravenous thrombolysis in stroke patients weighing over 100 kg. *Cerebrovasc Dis* 32: 201-206.
4. Hassan AE, Chaudhry SA, Jani V, Grigoryan M, Khan AA, et al. (2013) Is there a decreased risk of intracerebral hemorrhage and mortality in obese patients treated with intravenous thrombolysis in acute ischemic stroke? *J Stroke Cerebrovasc Dis* 22: 545-549.
5. Seo JH, Jeong HY, Noh S, Kim E-G, Ji K-H, et al. (2013) Relationship of Body Mass Index and Mortality for Acute Ischemic Stroke Patients after Thrombolysis Therapy. *J Neurocrit Care* 6: 92-96.
6. Seet RC, Zhang Y, Wijdicks EF, Rabinstein AA (2014) Thrombolysis outcomes among obese and overweight stroke patients: an age- and National Institutes of Health Stroke Scale-matched comparison. *J Stroke Cerebrovasc Dis* 23: 1-6.
